# Supplementary material
Source: HighWire-hosted journal article supplement (https://jnnp.bmj.com/content/90/9/1059)

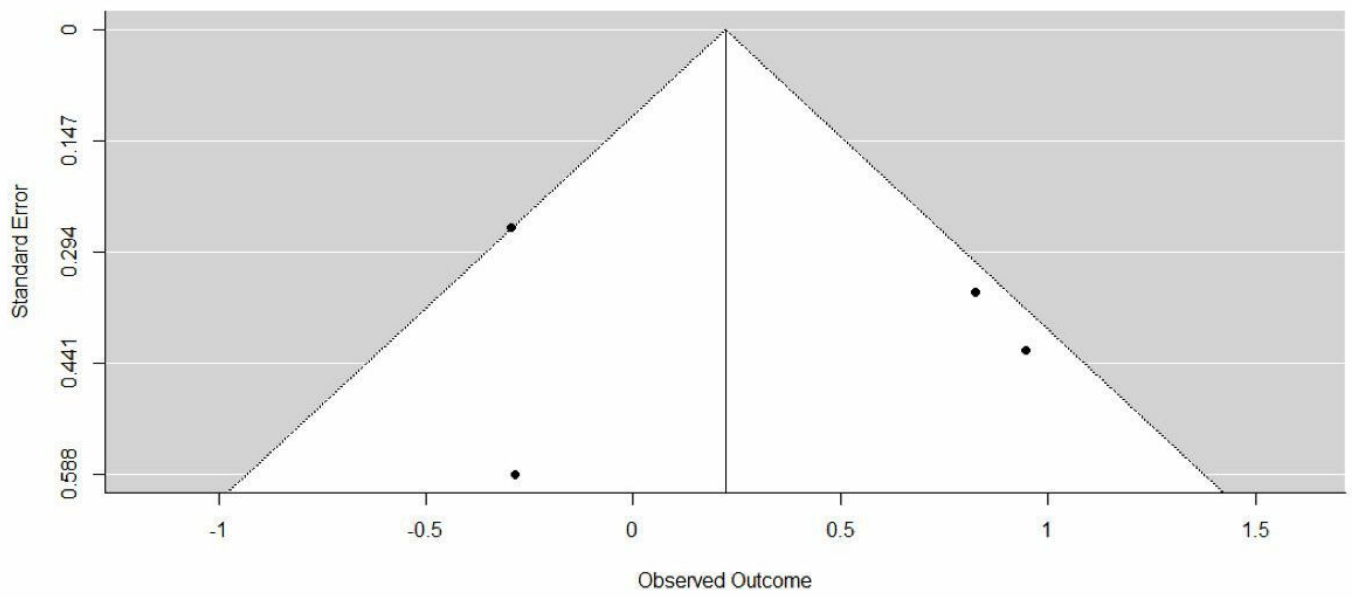

Supplement: inline-supplementary-material-8 [file inline-supplementary-material-8.pdf]
